1 **Title:** Evaluate the reliability of the apprenticeship in the first year of medical school:  
2 towards a reliable first level ultrasound examination.

3

4 Michela Cristina Turci<sup>¶1</sup>, Massimo Tassoni<sup>¶2</sup>, Florida Gajtani<sup>&2</sup>, Antonino Michele  
5 Previtera<sup>&3</sup>, Alberto Magenta-Biasina<sup>&4</sup>, Elia Mario Biganzoli<sup>¶5</sup> and Graziano Serrao<sup>\*¶2,3</sup>.

6 <sup>1</sup>Dept. of Biomedical Sciences for Health. Università degli Studi di Milano. Via Mangiagalli, 31 I-20133 Milan,  
7 Italy; <sup>2</sup>SPUMS San Paolo Ultrasounds Medical School, San Paolo Hospital. Università degli Studi di Milano.  
8 Via Antonio di Rudinì, 8 I-20142 Milan, Italy; <sup>3</sup>Dept. of Health Sciences. Università degli Studi di Milano. Via  
9 Antonio di Rudinì, 8 I-20142 Milan, Italy; <sup>4</sup>Servizio di Radiologia Diagnostica e Interventistica. Azienda  
10 Ospedaliera Santi Paolo e Carlo, Ospedale San Paolo. Via Antonio di Rudinì, 8 I-20142 Milan, Italy; <sup>5</sup>Dept. of  
11 Clinical Sciences and Community Health. Università degli Studi di Milano. Via Augusto Vanzetti, 5 I-20133  
12 Milan, Italy.

13

14 \* Corresponding author

15 E-mail: [graziano.serrao@unimi.it](mailto:graziano.serrao@unimi.it); iD: 0000-0001-9651-7685

16 <sup>¶</sup>These authors contributed equally to this work

17 <sup>&</sup>These authors also contributed equally to this work

18

19 **Conflict of interests:** The authors declare that they have no proprietary, commercial, or  
20 financial interests that could be construed to have inappropriately influenced this study.

21 **Funding:** NONE

22 **Authors Contributions**

23 **Conceptualization:** Graziano Serrao

24 **Data Curation:** Massimo Tassoni, Michela Cristina Turci

25 **Investigation:** Massimo Tassoni, Florida Gajtani, Alberto Magenta Biasina, Antonino  
26 Michele Previtera

27 **Formal Analysis:** Elia Mario Biganzoli

28 **Writing – Original Draft Preparation** Michela Cristina Turci, Graziano Serrao

29 **Writing – Review & Editing:** all authors

30

31 **Abstract**

32 **Objectives**

33 Our aim was to motivate apprentices' sonographer needs, to appraise their own  
34 measurements, to reduce inconsistencies within and between operators. Deep knowledge of  
35 ultrasound sectional anatomy is mandatory for an appropriate performance.

36

37 **Methods**

38 In three different weekdays, 3 sonographer apprentices (**rater**), randomly selected from a  
39 cohort of San Paolo Medical School first year students participated in vertically integrated  
40 study of living anatomy through ultrasound examination, repeated lumbar multifidus cross-  
41 sections scans on 6 subjects at lumbar level. The Agreement R package 0.8-1 was used to  
42 monitored the performances of each apprentice.

43

44 **Results**

45 The agreement ( $CCC_{intra}$  0.6749;  $CCC_{inter}$  0.556;  $CCC_{total}$  is 0.5438) was further from least  
46 acceptable CCC of 0.92-0.95. The precision indices ( $precision_{intra}$  0.6749;  $inter$  0.801;  
47  $total$  0.6274) were unsatisfactory, while the accuracy was high (0.9889 to 0.9913). The same  
48 occurred for the agreement on rater performances comparisons, where readings were high  
49 accurate (0.9537 to 0.9733) but moderately precise (0.7927 to 0.8895), not interchangeable  
50 TIR (1.173) but without rater supremacy. IIR ( $r1$  vs  $r2$  1.104,  $r1$  vs  $r3$  1.015,  $r2$  vs  $r3$  0.92) 95%  
51 confidence limits.

52

53 **Conclusions**

54 Apprentices were not reliable, repeatable, interchangeable. The weak link in the method  
55 seemed to be cultural weakness on vivo imaging morphologies, qualitative and quantitative  
56 measurement procedure on elementary statistical processing.

## 57 **Introduction**

58 Moved by evidence, teachers must work hardy to transform excellence into routine  
59 performances. Handle echography represents a key toll that allows an immediate correlation  
60 between imaging findings and clinical data, which will improve the management of prime  
61 care supply at the patient's home. The fast advancement on telemedicine, the increased use  
62 and the decreasing instrument costs lead to a great demand for appropriate education toward a  
63 sturdy echo's competence [1-5]. Echo continuously improves the instrumental semiotics  
64 potentials by making more anatomic structures visible. Since 2007 at San Paolo Medical  
65 School, an ultrasound learning resource was located within the anatomy area [6]. The focus  
66 of this educational training would be the capacity to forge a physician able to execute a first  
67 level ultrasound examination (**FLUx**). Often in clinical practice, only one measurement per  
68 patient is performed, hence before getting down to the data analysis you want to ensure that  
69 they are not contaminated by assessed procedure/factors.

70 Our aim was to verify apprentice's judgement validity and tune learning path.

71

## 72 **Methods**

73 Ultrasonic method is commonly described as largely employable, pliant, and non-invasive  
74 [6,7]. In 2009, San Paolo Medical School Didactic College planed vertically integrated study  
75 of the living body anatomy through peer physical and ultrasound examination. Core group of  
76 faculty experts in ultrasound developed a standardized curriculum that was presented to the  
77 student body. Faculty-supported facility for medical students' independent education projects  
78 allowed each student to be alternately examine and examiner [8]. To evaluate the  
79 competences acquired and tune the training on academic year 2019-2020, 3 women and 3

80 men (ranging in age 19 to 22±1.27yr, and in BMI 19.0 to 25.1±2.42 kg×m<sup>-2</sup>) healthy  
81 apprentices, ruffled among participants in the ultrasound living anatomy course took part in  
82 the present study as examines, but only 3 as examiners too. The Ethics Committee of the  
83 University of Milan examined and issued, an ex post favourable opinion on the project (03/28/2022  
84 advisory 31/22).

### 85 **Scanning procedure**

86 An experienced physiatrist (**AMP**) evaluated each drawn student to exclude any sequels that  
87 could alter the region of interest. A multi-frequency probe equipped ultrasound machine B-  
88 mode Real Time (Logic QE, Medical Systems, Milwaukee, WI, USA) was used. A convex  
89 probe at 5 MHz emission was employed [9,10], 3 apprentices (**raters**), under conditions as  
90 close as possible to the clinical daily routine, performed ultrasound scans then run  
91 measurement/rating process.

92 Following the procedure commonly recommended in literature, each rater proceeded by steps.  
93 To flattening down the lumbar lordosis the subject lied prone with a pillow under the pubic  
94 bones and feet off the bed, arms along her/his hips and head turned toward the most  
95 comfortable side (**Fig. 1**). To identify the spinous processes of L4-L5 the rater aligned each  
96 of her/his index fingers with the correspondent iliac crest and extended the thumbs towards  
97 the spinous processes of the vertebral column (**Fig.2**) [11]. To confirm the level found by  
98 palpation, each rater verifies by ultrasound scan [12]. In order to allow the vertebral lamina,  
99 the multifidus muscle was scanned longitudinally (**Fig. 3**).

100

101 **Figure 1. Subject position.**

102 **Figure 2. Identification of the spinous processes.**

103 **Figure 3. Lumbar longitudinal scan between L4 and sacrum a: apex of the spinous**  
104 **process, b: yellow ligament, c: median sacral crest.**

105

106 Thereafter in order to be transverse correctly aligned, the rater performed a 90° rotation of the  
107 probe. The discrimination of lateral edges of multifidus out of the surrounding muscles was  
108 the most difficult part of the scanning protocol. Each subject was requested of slightly lifting  
109 the ipsilateral lower limb from the couch; the identification of that lateral edge was so  
110 favored. After the contraction, before measuring the muscle diameters, the rater waited a few  
111 seconds to settle the rest position [13,14]. After having identified the multifidus, the rater  
112 moved the probe to the left and then to the right while tracing antero-posterior (r/lAP) and  
113 latero-lateral diameter (r/LL) assessments. On frozen images, the AP diameter, from the  
114 lamina to the inner edge of the upper edge of the multifidus, and the LL diameter,  
115 corresponding to the maximum width from the lateral edge of the multifidus to the spine,  
116 were marked out. Each rater established independently the positioning of the subject and the  
117 anatomical landmarks. Raters were not aware to other rater's judgments. In accord with  
118 Watson statements [15,16], 3 repeated measurements are usually considered appropriate,  
119 hence on different weekdays, the procedure was 3 times repeated, on 6 subjects, at five  
120 vertebral levels, on each side and therefore 180 scans generated 360 diameters.

121

## 122 **Statistical analysis**

123 Reliable and accurate measurements have a common theme: assessing closeness (agreement)  
124 between observations. Because there are 3 raters involved, one may like assessing the intra,  
125 inter and the total agreement with replicated readings produced by different observers. A  
126 meaningful statistic to measure the agreement of observations has been the mean squared  
127 deviation (**MSD**). The *Concordance Correlation Coefficient* (**CCC**), a scaled index proposed  
128 by Lin [17,18], translates the MSD into a combine's coefficients of precision (degree of  
129 refinement) and accuracy (degree of total displacement) that can be used to compare the  
130 differences between operators and sessions. To esteem multiple observers with replications,  
131 where none of the observers is treated as reference, Barnhart [19] proposed  $CCC_{total}$ ,  $CCC_{inter}$ ,

132 and  $CCC_{intra}$  series of indices. Another intuitive agreement index is a measure that captures a  
133 large proportion of data within a settled maximum acceptable absolute difference between  
134 two observers' readings. This probability is called *coverage probability (CP)*. On the other  
135 hand, if we set a predetermined coverage probability, we can find the boundary so that the  
136 probability of absolute difference is less than the boundary itself. This boundary called *total*  
137 *deviation index (TDI)* is proportional to the square root of the MSD and it is a performance  
138 measurement. A satisfactory agreement may require a large CP or equivalently a small TDI  
139 [\[18,20,21\]](#).

140 When multiple raters are available with replicates, we are often interested if raters are  
141 interchangeable. The *Total-Intra Ratio (TIR)* assesses comparative agreement indices for the  
142 interchangeability between multiple raters with multiple readings. The scale criterion means  
143 that the  $MSD_{total-raters}$  cannot be more than a predefined value of the  $MSD_{intra-rater}$ , or  $TIR_R <$   
144 predefined value, with 95% confidence. In addition, we compared the intra rater precision by  
145 computing  $MSD_{intra1\_2}/MSD_{intra3}$ ,  $MSD_{intra1\_3}/MSD_{intra2}$ , and  $MSD_{intra2\_3}/MSD_{intra1}$  or *Intra-*  
146 *Intra Ratio (IIR)*. A  $100(1 - \alpha/2)$  % confidence interval for IIR is computed based on the log-  
147 transformed IIR estimates and claim the superiority or inferiority if the upper or lower limit is  
148 less than or greater than 1.0 [\[22\]](#). All index was computed by Agreement R package 0.8 [\[23\]](#).

149

## 150 **Results**

151 **Table 1** shows the multifidus cross section AP and LL diameters measurements (mm)  
152 relieved by each rater, for each subject and lumbar level.

153 **Table 1. AP e LL diameters values (mm) of the multifidus relieved by each rater are shown for each subject, lumbar level and**  
 154 **repeat (t1,2,3).**  
 155

| subject | level | right anteropost |        |        |        |        |        |        |        |        | left anteropost |        |        |        |        |        |        |        |        | right laterolateral |        |        |        |        |        |        |        |        | left laterolateral |        |        |        |        |        |        |        |        |
|---------|-------|------------------|--------|--------|--------|--------|--------|--------|--------|--------|-----------------|--------|--------|--------|--------|--------|--------|--------|--------|---------------------|--------|--------|--------|--------|--------|--------|--------|--------|--------------------|--------|--------|--------|--------|--------|--------|--------|--------|
|         |       | rater1           | rater1 | rater1 | rater2 | rater2 | rater2 | rater3 | rater3 | rater3 | rater1          | rater1 | rater1 | rater2 | rater2 | rater2 | rater3 | rater3 | rater3 | rater1              | rater1 | rater1 | rater2 | rater2 | rater2 | rater3 | rater3 | rater3 | rater1             | rater1 | rater1 | rater2 | rater2 | rater2 | rater3 | rater3 | rater3 |
| 1       | L1    | 154              | 158    | 177    | 125    | 159    | 160    | 179    | 146    | 141    | 140             | 149    | 163    | 110    | 151    | 149    | 153    | 139    | 137    | 206                 | 216    | 192    | 179    | 168    | 199    | 318    | 163    | 98     | 182                | 182    | 163    | 193    | 220    | 230    | 291    | 208    | 163    |
| 2       | L1    | 231              | 198    | 218    | 161    | 219    | 197    | 193    | 176    | 155    | 190             | 218    | 215    | 159    | 175    | 202    | 168    | 166    | 159    | 216                 | 210    | 156    | 186    | 163    | 172    | 314    | 182    | 188    | 174                | 181    | 148    | 135    | 202    | 152    | 296    | 202    | 210    |
| 3       | L1    | 213              | 219    | 252    | 190    | 165    | 194    | 159    | 162    | 146    | 193             | 227    | 196    | 191    | 168    | 189    | 159    | 152    | 157    | 326                 | 227    | 204    | 192    | 188    | 233    | 296    | 202    | 126    | 286                | 223    | 181    | 177    | 191    | 220    | 186    | 185    | 168    |
| 4       | L1    | 215              | 168    | 191    | 163    | 199    | 143    | 142    | 162    | 160    | 175             | 132    | 188    | 159    | 188    | 151    | 148    | 141    | 157    | 177                 | 244    | 204    | 161    | 226    | 202    | 95     | 124    | 106    | 140                | 226    | 182    | 172    | 189    | 150    | 95     | 118    | 103    |
| 5       | L1    | 180              | 129    | 169    | 164    | 165    | 141    | 149    | 123    | 121    | 177             | 142    | 167    | 115    | 121    | 158    | 132    | 129    | 104    | 217                 | 208    | 154    | 136    | 243    | 187    | 156    | 171    | 159    | 203                | 213    | 171    | 139    | 219    | 197    | 187    | 169    | 152    |
| 6       | L1    | 192              | 173    | 202    | 169    | 164    | 202    | 198    | 137    | 180    | 236             | 172    | 195    | 168    | 156    | 212    | 173    | 152    | 188    | 148                 | 247    | 160    | 207    | 257    | 221    | 159    | 152    | 163    | 168                | 209    | 277    | 179    | 218    | 174    | 229    | 229    | 205    |
| 1       | L2    | 210              | 226    | 165    | 199    | 222    | 192    | 226    | 202    | 173    | 237             | 248    | 216    | 208    | 239    | 184    | 218    | 183    | 173    | 377                 | 254    | 223    | 350    | 261    | 235    | 354    | 194    | 143    | 345                | 279    | 230    | 421    | 251    | 224    | 408    | 263    | 143    |
| 2       | L2    | 154              | 201    | 203    | 127    | 223    | 215    | 202    | 205    | 188    | 156             | 233    | 257    | 118    | 262    | 213    | 205    | 166    | 168    | 177                 | 327    | 188    | 174    | 251    | 195    | 285    | 197    | 241    | 174                | 318    | 158    | 179    | 353    | 202    | 283    | 260    | 235    |
| 3       | L2    | 219              | 216    | 206    | 155    | 192    | 213    | 238    | 171    | 207    | 191             | 156    | 247    | 153    | 179    | 270    | 213    | 143    | 176    | 215                 | 187    | 236    | 159    | 253    | 182    | 269    | 123    | 152    | 219                | 176    | 191    | 179    | 173    | 190    | 261    | 126    | 123    |
| 4       | L2    | 262              | 182    | 177    | 210    | 182    | 187    | 257    | 140    | 188    | 250             | 175    | 212    | 247    | 164    | 187    | 247    | 165    | 160    | 386                 | 215    | 276    | 332    | 255    | 184    | 309    | 155    | 132    | 321                | 179    | 211    | 278    | 249    | 182    | 405    | 143    | 127    |
| 5       | L2    | 183              | 224    | 156    | 193    | 185    | 172    | 163    | 187    | 129    | 211             | 196    | 203    | 161    | 210    | 195    | 132    | 173    | 135    | 202                 | 195    | 271    | 161    | 147    | 218    | 89     | 159    | 142    | 206                | 168    | 168    | 202    | 173    | 164    | 101    | 159    | 145    |
| 6       | L2    | 223              | 208    | 216    | 189    | 201    | 202    | 160    | 189    | 199    | 183             | 261    | 185    | 163    | 176    | 210    | 176    | 194    | 171    | 202                 | 213    | 245    | 182    | 263    | 237    | 176    | 192    | 225    | 188                | 220    | 277    | 166    | 248    | 207    | 173    | 242    | 235    |
| 1       | L3    | 221              | 237    | 171    | 177    | 217    | 238    | 198    | 256    | 185    | 217             | 237    | 181    | 228    | 263    | 255    | 159    | 222    | 168    | 247                 | 346    | 230    | 213    | 268    | 218    | 215    | 241    | 114    | 194                | 310    | 243    | 167    | 304    | 249    | 199    | 235    | 182    |
| 2       | L3    | 163              | 229    | 260    | 134    | 257    | 271    | 181    | 188    | 222    | 187             | 248    | 282    | 158    | 233    | 268    | 165    | 182    | 224    | 222                 | 335    | 254    | 179    | 350    | 289    | 283    | 168    | 258    | 190                | 401    | 226    | 253    | 256    | 263    | 306    | 303    | 242    |
| 3       | L3    | 224              | 187    | 258    | 185    | 191    | 282    | 263    | 204    | 187    | 247             | 204    | 218    | 219    | 209    | 276    | 265    | 193    | 202    | 302                 | 304    | 254    | 245    | 213    | 294    | 412    | 131    | 131    | 273                | 266    | 227    | 161    | 203    | 238    | 385    | 212    | 233    |
| 4       | L3    | 267              | 133    | 199    | 252    | 168    | 207    | 245    | 163    | 204    | 260             | 171    | 196    | 248    | 193    | 201    | 260    | 182    | 200    | 376                 | 263    | 323    | 317    | 251    | 214    | 335    | 219    | 187    | 355                | 228    | 254    | 206    | 280    | 258    | 378    | 219    | 193    |
| 5       | L3    | 175              | 199    | 152    | 207    | 230    | 165    | 188    | 180    | 141    | 225             | 195    | 163    | 214    | 212    | 190    | 185    | 176    | 168    | 221                 | 251    | 288    | 249    | 177    | 212    | 154    | 171    | 140    | 221                | 283    | 289    | 352    | 188    | 179    | 190    | 183    | 143    |
| 6       | L3    | 268              | 187    | 263    | 192    | 193    | 230    | 182    | 177    | 205    | 208             | 228    | 224    | 195    | 223    | 223    | 202    | 251    | 213    | 241                 | 286    | 299    | 223    | 305    | 240    | 227    | 294    | 228    | 314                | 289    | 248    | 234    | 327    | 287    | 227    | 346    | 253    |
| 1       | L4    | 257              | 181    | 204    | 270    | 193    | 230    | 179    | 246    | 229    | 236             | 210    | 205    | 203    | 159    | 223    | 218    | 328    | 233    | 313                 | 372    | 296    | 230    | 288    | 283    | 272    | 330    | 278    | 245                | 388    | 290    | 267    | 256    | 321    | 246    | 306    | 286    |
| 2       | L4    | 185              | 261    | 275    | 139    | 248    | 260    | 223    | 291    | 241    | 187             | 240    | 235    | 136    | 230    | 257    | 199    | 326    | 258    | 253                 | 341    | 292    | 193    | 336    | 329    | 291    | 409    | 333    | 215                | 244    | 252    | 200    | 208    | 349    | 370    | 359    | 338    |
| 3       | L4    | 259              | 212    | 257    | 206    | 232    | 293    | 257    | 270    | 297    | 243             | 233    | 248    | 163    | 236    | 261    | 321    | 260    | 308    | 335                 | 379    | 294    | 321    | 382    | 394    | 377    | 300    | 317    | 229                | 354    | 294    | 177    | 326    | 288    | 341    | 330    | 353    |
| 4       | L4    | 250              | 177    | 216    | 255    | 171    | 240    | 262    | 205    | 247    | 265             | 217    | 232    | 266    | 201    | 254    | 266    | 205    | 255    | 387                 | 248    | 363    | 432    | 229    | 311    | 344    | 309    | 333    | 359                | 267    | 307    | 343    | 257    | 329    | 417    | 341    | 314    |
| 5       | L4    | 253              | 257    | 181    | 186    | 238    | 161    | 257    | 213    | 177    | 242             | 215    | 213    | 201    | 243    | 131    | 254    | 191    | 187    | 176                 | 332    | 333    | 229    | 227    | 199    | 316    | 211    | 168    | 173                | 411    | 326    | 237    | 243    | 200    | 302    | 235    | 182    |
| 6       | L4    | 261              | 200    | 232    | 161    | 235    | 227    | 218    | 228    | 286    | 240             | 198    | 233    | 157    | 205    | 255    | 193    | 269    | 297    | 247                 | 308    | 275    | 233    | 305    | 321    | 364    | 300    | 395    | 203                | 287    | 286    | 262    | 344    | 349    | 293    | 351    | 320    |
| 1       | L5    | 238              | 202    | 224    | 259    | 217    | 227    | 261    | 258    | 218    | 271             | 179    | 187    | 267    | 203    | 221    | 286    | 255    | 211    | 374                 | 397    | 319    | 351    | 337    | 336    | 311    | 426    | 331    | 370                | 396    | 282    | 341    | 286    | 351    | 307    | 443    | 283    |
| 2       | L5    | 190              | 263    | 229    | 149    | 248    | 229    | 193    | 256    | 256    | 199             | 260    | 247    | 165    | 236    | 238    | 185    | 266    | 260    | 272                 | 362    | 369    | 204    | 382    | 374    | 403    | 320    | 392    | 277                | 327    | 325    | 219    | 360    | 376    | 299    | 343    | 376    |
| 3       | L5    | 219              | 191    | 237    | 234    | 161    | 255    | 230    | 247    | 264    | 252             | 207    | 252    | 198    | 215    | 271    | 241    | 256    | 269    | 352                 | 363    | 344    | 382    | 216    | 366    | 445    | 347    | 343    | 327                | 370    | 322    | 252    | 279    | 329    | 445    | 334    | 339    |
| 4       | L5    | 262              | 138    | 212    | 237    | 170    | 216    | 261    | 191    | 242    | 239             | 137    | 224    | 249    | 174    | 202    | 246    | 179    | 253    | 391                 | 271    | 359    | 353    | 347    | 193    | 332    | 364    | 353    | 354                | 291    | 367    | 354    | 280    | 201    | 336    | 423    | 359    |
| 5       | L5    | 194              | 201    | 194    | 221    | 290    | 115    | 223    | 280    | 199    | 210             | 251    | 196    | 261    | 285    | 125    | 241    | 275    | 190    | 202                 | 359    | 371    | 257    | 296    | 188    | 344    | 326    | 384    | 221                | 316    | 316    | 229    | 320    | 180    | 344    | 330    | 350    |
| 6       | L5    | 256              | 201    | 165    | 249    | 205    | 207    | 201    | 230    | 241    | 229             | 238    | 204    | 219    | 238    | 235    | 177    | 225    | 236    | 268                 | 376    | 398    | 326    | 374    | 361    | 342    | 347    | 345    | 273                | 413    | 407    | 306    | 416    | 417    | 391    | 387    | 382    |

156  
 157  
 158 Based on multifidus assessments conducted by experts in the field found out on literature in terms of agreement, we set a within-rater deviation not  
 159 more than 30% of the total deviation, and inter-rater deviation not more than 50% of the total deviation. These translated into a least acceptable  
 160 CCC<sub>intra</sub> of 0.91 (1 - 0,3<sup>2</sup>), and a least acceptable CCC<sub>inter</sub> of 0.75 (1 - 0,5<sup>2</sup>).  
 161



The CCC estimates are shown on **Table 2**.

**Table 2. CCC estimates (see text for details).**

| Statistics                 | Estimate | 95% CI |
|----------------------------|----------|--------|
| CCC <sub>intra</sub>       | 0.674    | 0.597  |
| CCC <sub>inter</sub>       | 0.792    | 0.732  |
| CCC <sub>total</sub>       | 0.621    | 0.627  |
| Precision <sub>intra</sub> | 0.674    | 0.597  |
| Precision <sub>inter</sub> | 0.801    | 0.744  |
| Precision <sub>total</sub> | 0.627    | 0.550  |
| Accuracy <sub>intra</sub>  |          |        |
| Accuracy <sub>inter</sub>  | 0.988    | 0.980  |
| Accuracy <sub>total</sub>  | 0.991    | 0.984  |

The CCC<sub>intra</sub> was estimated to be 0.6749, which means a within-sample deviation is about 57 %  $\sqrt{(1 - 0.6749)}$  of the total deviations. The CCC<sub>inter</sub> was estimated to be 0.7921, which means a within-sample deviation is about  $\sqrt{(1 - 0.791)}$  63% of the total deviations [17]. The CCC<sub>total</sub> was estimated to be 0.6219, which means for individual observations from different rater, the within-sample deviation is about 61% of the total deviations. These findings are consistent with moderate precision (0.6749<sub>intra</sub>, 0.8<sub>inter</sub>, 0.6274<sub>total</sub>), but high accuracy (0.9889<sub>inter</sub> to 0.9913<sub>total</sub>) ever larger than 0.95 and 0.91, respectively. Performance analysis of raters is shown in **Table 4**.

**Table 3. Rater performances (see text for details).**

| Statistics                   | Estimate | 95% CI        | Allowance | RBS   |
|------------------------------|----------|---------------|-----------|-------|
| TDI <sub>.95 r1-2</sub>      | 5.573    | 6.19          | 5.4       |       |
| TDI <sub>.95 r1-3</sub>      | 8.494    | 9.453         | 5.4       |       |
| TDI <sub>.95 r2-3</sub>      | 8.608    | 9.581         | 5.4       |       |
| CP <sub>54 r1-2</sub>        | 0.941    | 0.908         | 0.95      | 0.234 |
| CP <sub>54 r1-3</sub>        | 0.783    | 0.730         | 0.95      | 0.03  |
| CP <sub>54 r2-3</sub>        | 0.777    | 0.723         | 0.95      | 0.01  |
| TIR <sub>r1-2-3 vs all</sub> | 1.173    | 1.72          | 1.5       |       |
| IIR <sub>r1 vs r2</sub>      | 1.104    | (0.842,1.447) | 1         |       |
| IIR <sub>r1 vs r3</sub>      | 1.015    | (0.687,1.499) |           |       |
| IIR <sub>r2 vs r3</sub>      | 0.92     | (0.633,1.336) |           |       |

RBS relative bias squared.

The agreement was moderate and further from least acceptable CCC of 0.91-0.95. This finding agrees with the data presented in **Fig. 4a-c**, where readings were evenly scattered around the 45°

line (high accuracy 0.9537 to 0.9733) but not tightly scattered (moderate precision 0.7927 to 0.8895). The plots indicated that score differences tended to be more dispersed for large value correspondent to a lower lumbar level.

**Fig 4. Inter-rater (R) agreement: a R1vsR2; b R1vsR3; c R2vsR3.**

In terms of TDI and CP indices, the least acceptable agreement was set as having at least 95% pair's observations within 5.4 mm (allowance, equal to 20% of all measurements mean), independently to rater. The  $TDI_{0.95r1r2}$  estimate was 5.573 mm, close to 5.4 mm target values, which means based on the average readings, 95% of the readings are within 5.573 mm of their replicate readings from the other rater. The  $TDI_{0.95r1r3}$  estimate was 8.494 mm, and the  $TDI_{0.95r2r3}$  estimate was 8.608 mm. The one-sided upper confidence limit for  $TDI_{0.95r1r2}$  was 6.19mm,  $TDI_{0.95r1r3}$  9.453mm, and  $TDI_{0.95r2r3}$  9.581mm all larger than target values. The  $CP_{54r1r2}$  estimate was 0.9418, which means that 94% of observations were within their target values from the other rater. The one-sided lower confidence limit for  $CP_{54r1r2}$  was 0.9170, smaller than 0.95. The  $CP_{54r1r3}$  estimate was 0.7835 and  $CP_{54r2r3}$  0.7773 which means that 78% of observations are within 5.4 mm. The one-sided lower confidence limit for  $CP_{54r1r3}$  was 0.7301, and for  $CP_{54r2r3}$  was 0.7236 both smaller than 0.95.

$TIR_{r1-2-3 \text{ vs all}}$  the ratio between average of the total MSD of all raters relative to the average of intra MSD of all raters, was estimated to be 1.173, with a 95% upper confidence limit of 1.72. If we consider that a precision deviation of more than 50% (1.5 allowance) is clinically not acceptable, we cannot claim raters' interchangeability. The IIR was estimated to be  $IIR_{r1vsr2}$  1.04,  $IIR_{r1vsr3}$  1.015 and  $IIR_{r2vsr3}$  0.92. If we refer at the individual bioequivalence FDA criterion, that the ratio of geometric means between readings differences must lie between 0.8 and 1.25, IIR upper/lower 95% interval  $\{r1 \text{ vs } r2 (0.842, 1.447), r1 \text{ vs } r3 (0.687, 1.499), r2 \text{ vs } r3 (0.633, 1.336)\}$  indicated no rater precision supremacy.

## Discussion

The study confirmed the ultrasound procedure as an operator dependent technique that is prone to variable measurements. Each considered parameter (rater and replicates) induced bias. Each rater proved to be accurate but not sufficiently precise.

Lacking intra-operator and inter-operator reliability made impossible to compare data obtained by different raters of the same department or in different groups and centers, and also frustrated a complete tuning of correct guidelines. Because errors are inherent in every measurement procedure, one must ensure the magnitude of the measurement agreement [18,24,25]. In clinical practice measurements are detect to take a decision, consequently magnitude of acceptable differences between ratings, it depends on clinical decision consequences. No universal standard for an acceptable confidence interval is currently available, but most experts consider range values 0.8-1.25 as supporting good reliability. A confidence interval for the difference between measurement results indicates the smallest detectable difference (SDD) [26-29]. With repeated rating, any change outside these boundaries can be considered a true change in the entity being assessed. The smallest detectable difference it is a useful starting point in determining what is a minimum clinically important difference (MCID) in values handle.

When measurements show evidence of lack of agreement, we need to address the sources of the deficiencies. According to Alvan Feinstein [30] for gaining insight into the “*clinimetric*” property, we should reinforce apprentice’s attention on measurements methodologic discipline quality of the measurement [31,32]. To enable assessment in routine care, we’ll beckon worth on agreement, reliability, repeatability, and reproducibility. Because of that, it is essential to reinforce statistical skill in medical training too.

## Conclusions

The cohort sampled was limited but indicative to same training adjustments. Future efforts could focus on tear down “observational errors”. In order to improve rater’s performance, and promote inter-rater reliability, it should be considerers a number of strategies: training on imaging

morphologies, nurture feedback to those who have shown a low reproducibility, reinforce protocols.

All these methods used as a screening quality, self-evaluation check, and calibration experience

encourage raters to achieve 0.8-1.25 range values and gaining smallest detectable difference validity

[27,33].

## References

1. Narula S, Shameer K, Salem Omar AM, Dudley JT, Sengupta PP. Machine-Learning Algorithms to Automate Morphological and Functional Assessments in 2D Echocardiography. *J Am Coll Cardiol*. 2016 Nov 29;68(21):2287-2295. doi: 10.1016/j.jacc.2016.08.062. PMID: 27884247.
2. Papolos A, Narula J, Bavishi C, Chaudhry FA, Sengupta PP. U.S. Hospital Use of Echocardiography: Insights from the Nationwide Inpatient Sample. *J Am Coll Cardiol*. 2016 Feb 9;67(5):502-11. doi: 10.1016/j.jacc.2015.10.090. PMID: 26846948.
3. Bunting KV, Steeds RP, Slater LT, Rogers JK, Gkoutos GV, Kotecha D. A Practical Guide to Assess the Reproducibility of Echocardiographic Measurements. *J Am Soc Echocardiogr*. 2019 Dec;32(12):1505-1515. doi: 10.1016/j.echo.2019.08.015. Epub 2019 Oct 22. PMID: 31653530
4. Iagnocco A, Naredo E, Bijlsma JW. Becoming a musculoskeletal ultrasonographer. *Best Pract Res Clin Rheumatol*. 2013 Apr;27(2):271-81. doi: 10.1016/j.berh.2013.02.004. PMID: 23731935.
5. Kim EY, Park KH, Choi SJ, Chung W-J Educational value of pocket-sized ultrasound devices to improve understanding of ultrasound examination principles and sonographic anatomy for medical student. *PLoS ONE* 201712(9): e0185031.  
<https://doi.org/10.1371/journal.pone.0185031>
6. Fowlkes JB; Bioeffects Committee of the American Institute of Ultrasound in Medicine. American Institute of Ultrasound in Medicine consensus report on potential bioeffects of diagnostic ultrasound: executive summary. *J Ultrasound Med*. 2008 Apr;27(4):503-15.
7. Miller DL. Safety assurance in obstetrical ultrasound. *Semin Ultrasound CT MR*. 2008.
8. Serrao G, Tassoni M, Magenta-Biasina AM, Mantero AG, Previtera A, Turci MC, Biganzoli EM, Bertolini EAM. Virtual Dissection by Ultrasound: Probe Handling in the First Year of Medical Education. *Ultrasound Int Open*. 2017 Sep;3(4):E156-E162. doi: 10.1055/s-0043-121983. Epub 2017 Dec 7. PMID: 29226274; PMCID: PMC5721288.

9. Stokes M, Rankin G, Newham DJ. Ultrasound imaging of lumbar multifidus muscle: normal reference ranges for measurements and practical guidance on the technique. *Man Ther.* 2005 May;10(2):116-26
10. Whittaker JL, Teyhen DS, Elliott JM, Cook K, Langevin HM, Dahl HH, Stokes M. Rehabilitative ultrasound imaging: understanding the technology and its applications. *J Orthop Sports Phys Ther.* 2007 Aug;37(8):434-49
11. Fawcett E. A Note on the Identification of the Lumbar Vertebrae of Man. *J. Anat.* April 1932;66(Pt 3):384-6.
12. Kilby J, Heneghan NR, Maybury M. Manual palpation of lumbo-pelvic landmarks: a validity study. *Man Ther.* 2012 Jun;17(3):259-62
13. Hides J, Gilmore C, Stanton W, Bohlscheid E. Multifidus size and symmetry among chronic LBP and healthy asymptomatic subjects. *Man Ther.* 2008 Feb;13(1):43-9
14. Wallwork TL, Hides JA, Stanton WR. Intrarater and interrater reliability of assessment of lumbar multifidus muscle thickness using rehabilitative ultrasound imaging. *J Orthop Sports Phys Ther.* 2007 Oct;37(10):608-12.
15. Watson PF, Petrie A. Method agreement analysis: a review of correct methodology. *Theriogenology.* 2010 Jun;73(9):1167-79. doi: 0.1016/j.theriogenology.2010.01.003. PMID: 20138353.
16. Watson T. Ultrasound in contemporary physiotherapy practice. *Ultrasonics.* 2008 Aug;48(4):321-9.
17. Lin L, Hedayat AS, Wu W. A unified approach for assessing agreement for continuous and categorical data. *J Biopharm Stat.* 2007; 17.4:629-652
18. Lin, L. I., Hedayat, A. S., Sinha, B., and Yang, M. Statistical methods in assessing agreement: models, issues & tools. *Journal of American Statistical Association* 2002;97(457), 257-270
19. Barnhart HX, Haber M, Song J. Overall concordance correlation coefficient for evaluating agreement among multiple observers. *Biometrics.* 2002 Dec;58(4):1020-7.

20. Escaramís G, Ascaso C, Carrasco JL. The total deviation index estimated by tolerance intervals to evaluate the concordance of measurement devices. *BMC Med Res Methodol.* 2010 Apr 8;10:31. doi: 10.1186/1471-2288-10-31. PMID: 20377875; PMCID: PMC2859350.
21. Jang JH, Manatunga AK, Taylor AT, Long Q. Overall indices for assessing agreement among multiple raters. *Stat Med.* 2018 Dec 10;37(28):4200-4215. doi: 10.1002/sim.7912. Epub 2018 Jul 30. PMID: 30062738; PMCID: PMC6587587.
22. Lin L, Hedayat AS, Tang Y. A comparison model for measuring individual agreement. *J Biopharm Stat.* 2013 Mar 11;23(2):322-45
23. Yue Yu AND Lawrence Lin (2012). Agreement: Statistical Tools for Measuring Agreement. R package version 0.8-1. <https://CRAN.R-project.org/package=Agreement>
24. Barnhart HX, Song J, Haber MJ. Assessing intra, inter and total agreement with replicated readings. *Stat Med.* 2005 May 15;24(9):1371-84. doi: 10.1002/sim.2006. PMID: 15570569; PMCID: PMC1653
25. Barnhart HX, Haber MJ, Lin LI. An overview on assessing agreement with continuous measurements. *J Biopharm Stat.* 2007;17(4):529-69. doi: 10.1080/10543400701376480. PMID: 17613641.
26. Bruynesteyn K, Boers M, Kostense P, van der Linden S, van der Heijde D. Deciding on progression of joint damage in paired films of individual patients: smallest detectable difference or change. *Ann Rheum Dis.* 2005 Feb;64(2):179-82. doi: 10.1136/ard.2003.018457. Epub 2004 Jul 29. PMID: 15286006; PMCID: PMC1755378.
27. Lassere M, Boers M, van der Heijde D, Boonen A, Edmonds J, Saudan A, Verhoeven AC. Smallest detectable difference in radiological progression. *J Rheumatol.* 1999 Mar;26(3):731-9. PMID: 10090192.
28. Lassere MN, van der Heijde D, Johnson K, Bruynesteyn K, Molenaar E, Boonen A, Verhoeven A, Emery P, Boers M. Robustness and generalizability of smallest detectable difference in radiological progression. *J Rheumatol.* 2001 Apr;28(4):911-3. PMID: 11327275.

29. Riemann BL, Lininger MR. Statistical Primer for Athletic Trainers: The Essentials of Understanding Measures of Reliability and Minimal Important Change. *J Athl Train*. 2018 Jan;53(1):98-103. doi: 10.4085/1062-6050-503-16. Epub 2018 Jan 13. PMID: 29332472; PMCID: PMC5800735.
30. Feinstein AR. An additional basic science for clinical medicine: IV. The development of clinimetrics. *Ann Intern Med*. 1983 Dec;99(6):843-8. doi: 10.7326/0003-4819-99-6-843. PMID: 6651026.
31. de Vet HC, Terwee CB, Bouter LM. Current challenges in clinimetrics. *J Clin Epidemiol*. 2003 Dec;56(12):1137-41. doi: 10.1016/j.jclinepi.2003.08.012
32. Lexell JE, Downham DY. How to assess the reliability of measurements in rehabilitation. *Am J Phys Med Rehabil*. 2005 Sep;84(9):719-23. doi: 10.1097/01.phm.0000176452.17771.20. PMID: 16141752.
33. Hernaez R. Reliability and agreement studies: a guide for clinical investigators. *Gut*. 2015 Jul;64(7):1018-27. doi: 10.1136/gutjnl-2014-308619. Epub 2015 Apr 14. PMID: 25873640.



### 34. Figures

35.

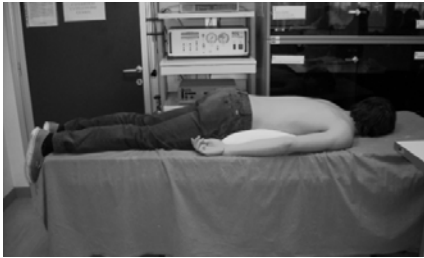

36.

37. **Figure 4.** Subject position.

38.

39.

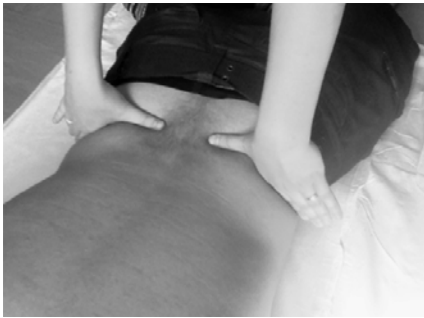

40.

41. **Figure 5.** Identification of the spinous processes.

42.

43.

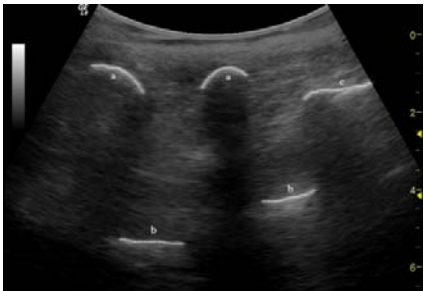

44.

45. **Figure 6.** Lumbar longitudinal scan between L4 and sacrum

46. **a:** apex of the spinous process, **b:** yellow ligament, **c:** median sacral crest.

47.

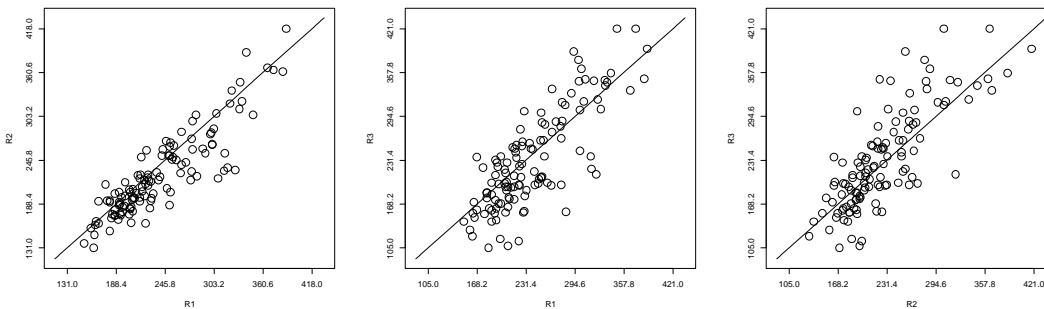

48.

49. **Fig 4.** Inter-rater (R) agreement: **a** R1vsR2; **b** R1vsR3; **c** R2vs
